# Supplementary material
Source: publisher figshare collection journal article supplement (https://acs.figshare.com/ndownloader/files/5181784)
Supplement: Supplementary file 1 [file 5181784]

### **NMR Spectra For Compounds In Supporting Information**

$^1\text{H}$  and  $^{13}\text{C}$  NMR spectra are included for most compounds and some mixtures described in the Supporting Information.  $^{31}\text{P}$  NMR spectra are included for some compounds. The spectra are presented in order of increasing compound number when possible, with other spectra interspersed in a manner consistent with experimental continuity.
